# Supplementary material for: Novel multifunctional dexamethasone carbon dots synthesized using the one-pot green method for anti-inflammatory, osteogenesis, and osteoimmunomodulatory in bone regeneration
Source: Royal Society of Chemistry journal article supplement (doi:10.1039/d2bm01153k), 2022-01-01
Supplement: d2bm01153k1.pdf [file d2bm01153k1.pdf]

## Supporting Information

### A novel multifunctional dexamethasone carbon dots synthesized by one-pot green method for anti-inflammatory, osteogenesis and osteoimmunomodulatory in bone regeneration

Chang Wan<sup>a</sup>, Mengyue Hu<sup>a</sup>, Xu Peng<sup>a, b</sup>, Ningning Lei<sup>a</sup>, Hongmei Ding<sup>a</sup>, Yihao Luo<sup>a</sup>,  
Xixun Yu<sup>a\*</sup>

*a. College of Polymer Science and Engineering, Sichuan University, Chengdu 610065,  
P.R. China.*

*b. Experimental and Research Animal Institute, Sichuan University, Chengdu 610065,  
P.R. China.*

Correspondence to: [yuxixun@163.com](mailto:yuxixun@163.com)

Table S1. QY of the DCDs dispersed in distilled water.

| Samples         | Integrated emission intensity ( $I$ ) | Abs. ( $A$ ) | Refractive index of solvent ( $n$ ) | QY( $\varphi$ ) |
|-----------------|---------------------------------------|--------------|-------------------------------------|-----------------|
| Quinine sulfate | 1261278901                            | 0.0831       | 1.334                               | 0.54            |
| CDs             | 273492635                             | 0.0451       | 1.334                               | 0.40            |

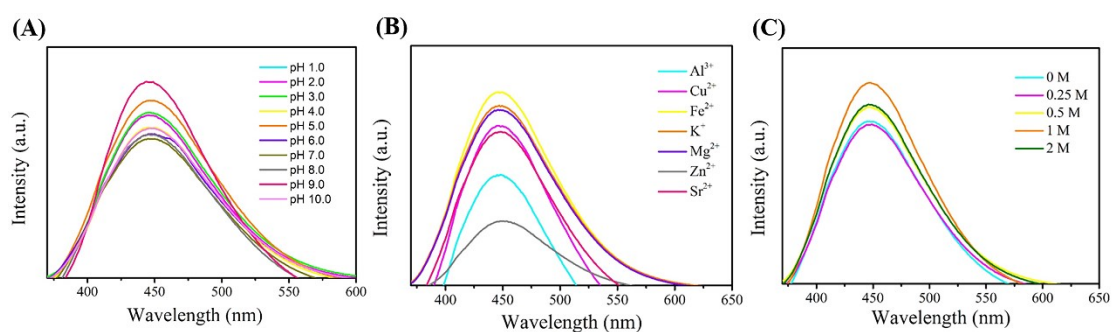

Fig. S1 Stability of DCDs.(A) dispersion in the solutions of different pH values; (B) mixing with cations and anions;(C) NaCl solution with different concentrations.

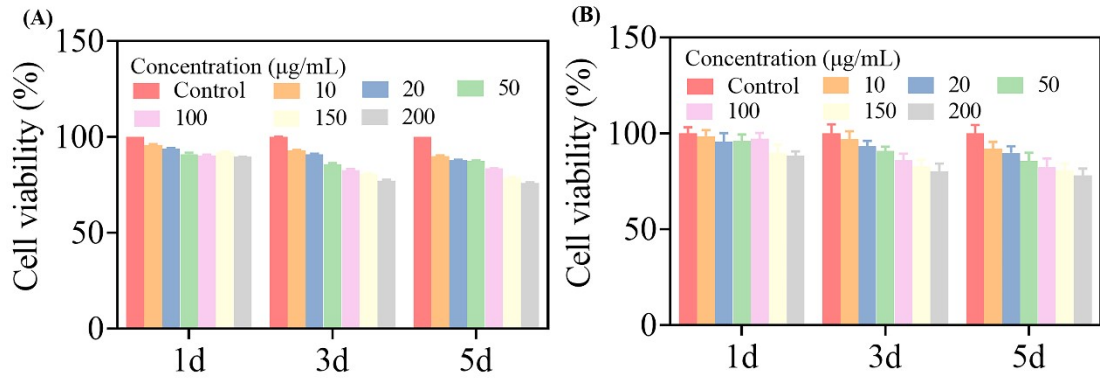

Fig. S2 Cytotoxicity assays of ACDs and FCDs. (A) CCK-8 assays of ACDs(n=5); (B) CCK-8 assays of FCDs(n=5).

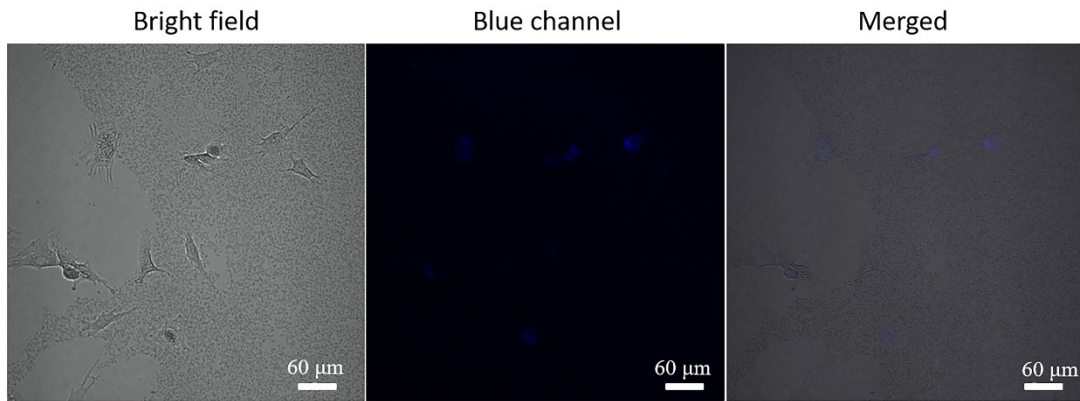

Fig. S3 Confocal images of rBMSCs cultured with DCDs for 6h under the blue channel.

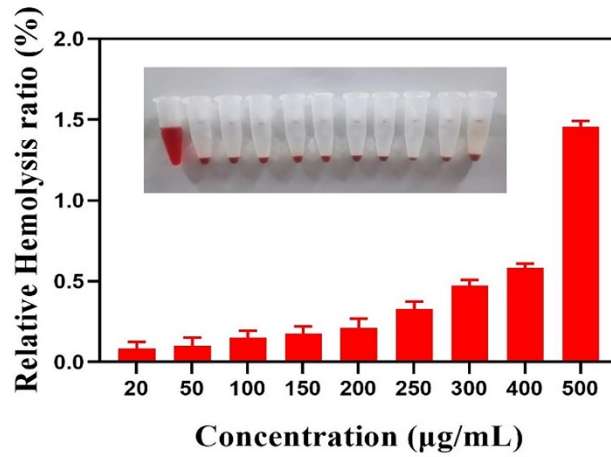

Fig. S4 Hemocompatibility of different concentrations of DCDs.

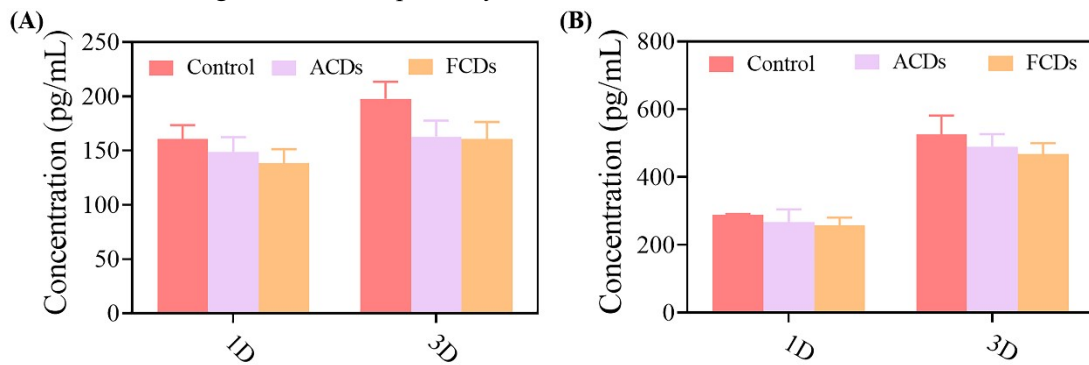

Fig. S5 Inflammatory cytokines detected by ELISA; (A) TNF- $\alpha$ , (B) IL-1 $\beta$ .

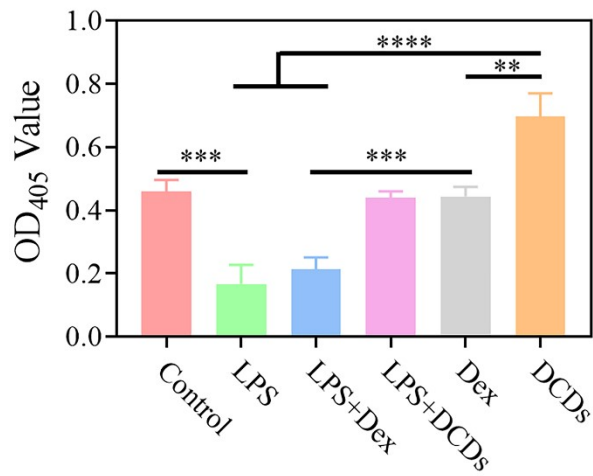

Figure S6 Quantitative analysis of ARS.

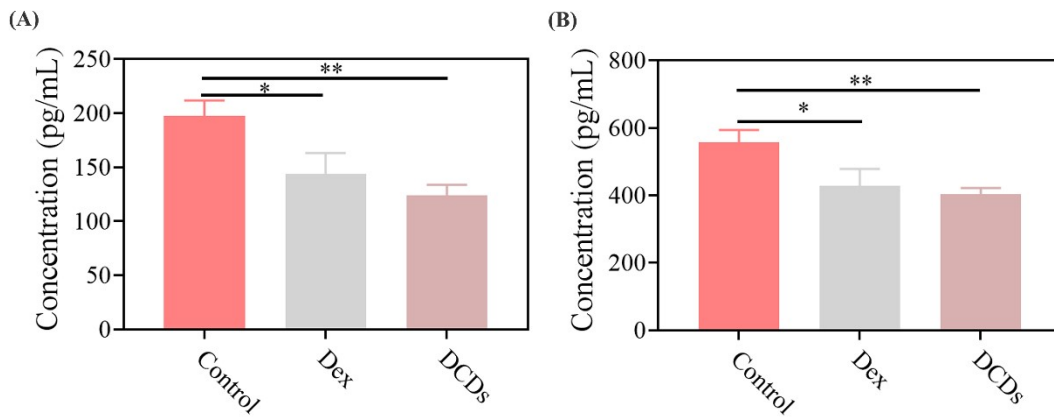

Fig. S7 Pro-inflammatory factors secreted by polarized macrophages . (A) TNF- $\alpha$ ;(B) IL-1 $\beta$ .

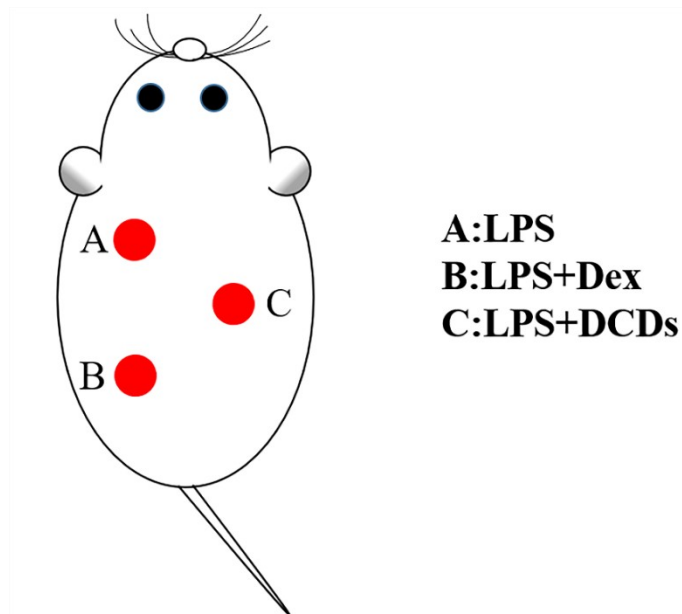

Fig. S8 Schematic diagram of material samples implanted in the back of SD rats.
